# Supplementary material for: Cathodic deposition of interlaced nanosheet-like cobalt sulfide films for high-performance supercapacitors
Source: Royal Society of Chemistry journal article supplement (doi:10.1039/c2ra22373b), 2012-10-04
Supplement: c2ra22373b.pdf [file c2ra22373b.pdf]

## Supporting Information for “Cathodic deposition of interlaced nanosheet-like cobalt sulfide films for high-performance supercapacitors”

Jeng-Yu Lin\* and Shu-Wei Chou

Mr. S. W. Chou and Dr. J. Y. Lin

Dept. of Chemical Engineering, Tatung University, No. 40, Sec. 3, Chungshan North Rd., Taipei  
City 104, Taiwan

Fax: +886-225861939

E-mail: [jylin@ttu.edu.tw](mailto:jylin@ttu.edu.tw)

[\*] Corresponding author

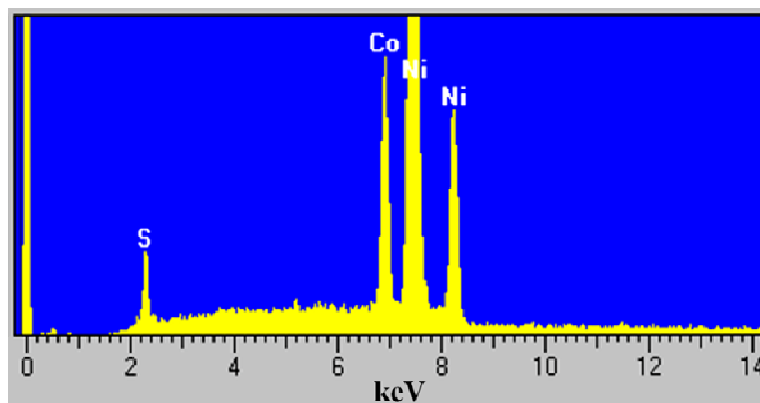

Figure S1 X-ray energy dispersive spectroscopy of the thin film deposited on Ni foam.

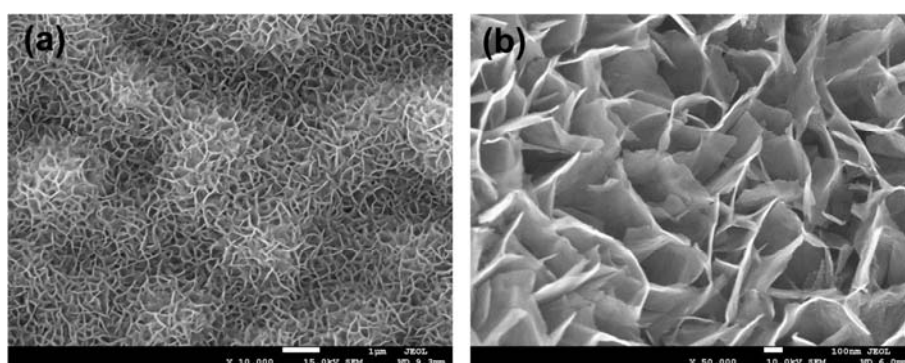

Figure S2 FESEM images of the interlaced nanosheet-like CoS electrode after 1000 consecutive charge-discharge cycles at  $8 \text{ A g}^{-1}$ . (a) 10000 X and (b) 50000 X.
